# Supplementary material for: Prevalence and Risk Factors of self-reported dry eye in Brazil using a short symptom questionnaire
Source: PubMed Central journal article supplement (PMC5794758; doi:10.1038/s41598-018-20273-9), 2018-02-01
Supplement: 41598_2018_20273_MOESM1_ESM.pdf [file 41598_2018_20273_MOESM1_ESM.pdf]

## **Title page**

Prevalence and Risk Factors of self-reported dry eye in Brazil using a short symptom questionnaire

## **Authors**

Julia Silvestre de Castro, MS, Iara Borin Selegatto MS, Rosane Silvestre de Castro MD, PhD, Eliana C. M. Miranda M.Ed. PhD, José Paulo Cabral de Vasconcelos MD, PhD, Keila Monteiro de Carvalho MD, PhD, Carlos Eduardo Leite Arieta MD, PhD, Monica Alves MD, PhD

University of Campinas – UNICAMP

Dry eye questionnaire:

Age: \_\_\_\_\_

Sex: ( ) male ( ) female

1.How often do your eyes feel dry?

( ) never

( ) sometimes

( ) often

( ) constantly

2.How often do your eyes feel irritated?

( ) never

( ) sometimes

( ) often

constantly

3. Have you ever been diagnosed (by a clinician) as having dry eye syndrome?

Yes  No

Mark the any of the following conditions if you have:

Menopause  Yes  No

Diabetes  Yes  No

Connective tissue disorders  Yes  No

Cancer therapy  Yes  No

Ocular surgery  Yes  No

Contact lens wear  Yes  No

Computer use more than 6 hours per day  Yes  No

Smoking  Yes  No

Antidepressants medications  Yes  No

Anti-allergy medications  Yes  No
